# Supplementary material
Source: HighWire-hosted journal article supplement (https://qdcxjkg.com/highwire/filestream/113228/field_highwire_adjunct_files/0/CME_32-1.pdf)
Supplement: CME_32-1.pdf [file CME_32-1.pdf]

# CME Exam and Evaluation (1 CME credit)

To receive CME credits, read the CME article in this issue, indicate the correct responses and complete the requested information below. The form is also available in electronic format at <http://www.erj.ersjournals.com/current.shtml>. To return the form, you can either:

- use this form and return it completed to ERSJ Ltd, 442 Glossop Road, Sheffield, S10 2PX, UK.
- save the electronic form as a Word document and send it by e-mail to [info@ersj.org.uk](mailto:info@ersj.org.uk)

Certificates will be emailed to the address filled in below. Please allow 4 weeks for processing.

## 1. Applicant personal details.

ERS Membership No. (if known): ..... Date of Birth (DD/MM/YYYY): .....

Family Name: ..... First Name: .....

Mailing Address: .....

Postal Code: ..... City: ..... Country: .....

Telephone: + ..... Fax: + .....

E-mail: .....

## 2. Educational questions. Answer by marking the correct answer.

### 1. All of the following statements are true, except? At high altitude:

- Hypobaric hypoxia increases ventilation and induces respiratory alkalosis.
- Periodic breathing characterised by crescendo-decrescendo ventilation with hyperpnoea alternating with hypopnoea/apnoea can be observed in adults.
- Periodic breathing causes frequent arousals from sleep, resulting in poor sleep quality, one of the manifestations of acute mountain sickness.
- There is a negligible intersubject variability in periodic breathing during sleep.

### 2. Which of the following statements is false? During acute high-altitude exposure:

- A similar degree of hypoxaemia and hyperventilation is found in children compared with adults.
- Adults have less periodic breathing during sleep compared with children.
- Children have a lower apnoea threshold for CO<sub>2</sub> during sleep compared with adults.
- Children have a shorter circulation time compared with adults.

### 3. Which of the following statements is true? At 3,450 metres above sea level:

- Adults experience symptoms of acute mountain sickness more frequently than children.
- Symptoms of acute mountain sickness are typically found in less than 10% of adults.
- Symptoms of acute mountain sickness are found in approximately 50% of prepubertal children.
- Symptoms of acute mountain sickness are found in all children and adults.
